# Supplementary material
Source: Research Square preprint supplement (doi:10.21203/rs.3.rs-9345788/v1)

# **Silicon Carbide Reinforced Bio-Based Alkyd–Polyurethane Coatings: Structure–Property Relationship and Durability Enhancement**

Pavan M. Paraskar\*<sup>1</sup>, Ranjeet B. Doke<sup>2</sup>, Nilesh R. Patil<sup>2</sup>, Yogeshsing N. Rajput<sup>2</sup>, Vinod M. Hatkar<sup>2</sup>, Ravindra D. Kulkarni<sup>2</sup>

<sup>1</sup>PRISM Research Institute, Technological University of Shannon, Midlands and Midwest,  
Athlone Campus, University Road, N37 HD68 Athlone, Ireland

<sup>2</sup>Department of Oils, Oleochemical and Surfactant Technology,  
Institute of Chemical Technology Mumbai-400019, Maharashtra, India

\*Corresponding author: [pavan.paraskar@tus.ie](mailto:pavan.paraskar@tus.ie)

## **Supporting Information**

### **Table of Contents**

**I) Fig. S1** Bode plots of PU nanocomposite coatings

**II) Fig. S2** Nyquist plots of PU nanocomposite coatings

**D) Fig. S1** Bode plots of PU nanocomposite coatings

**Bare Metal**

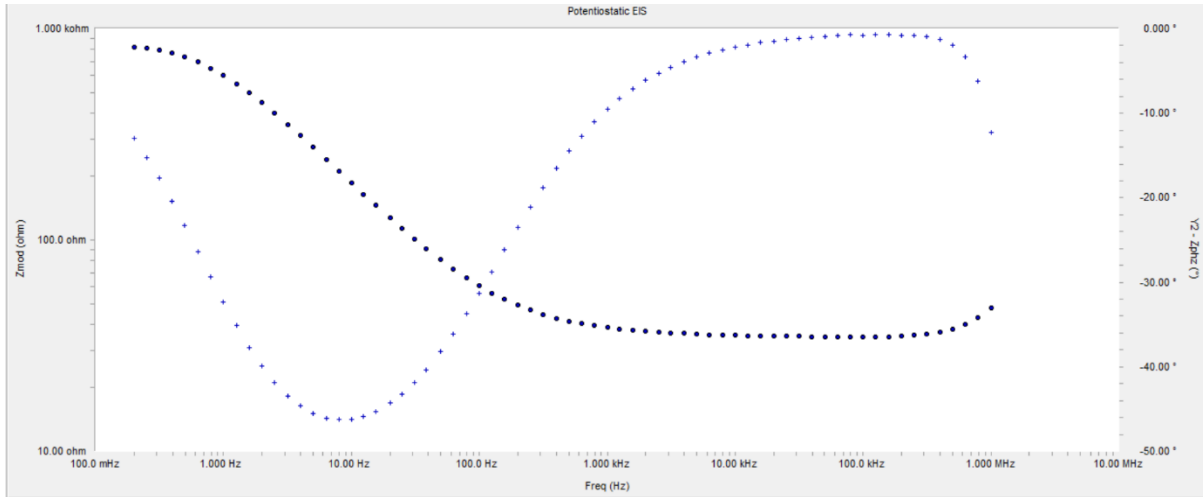

**NSOPU-0**

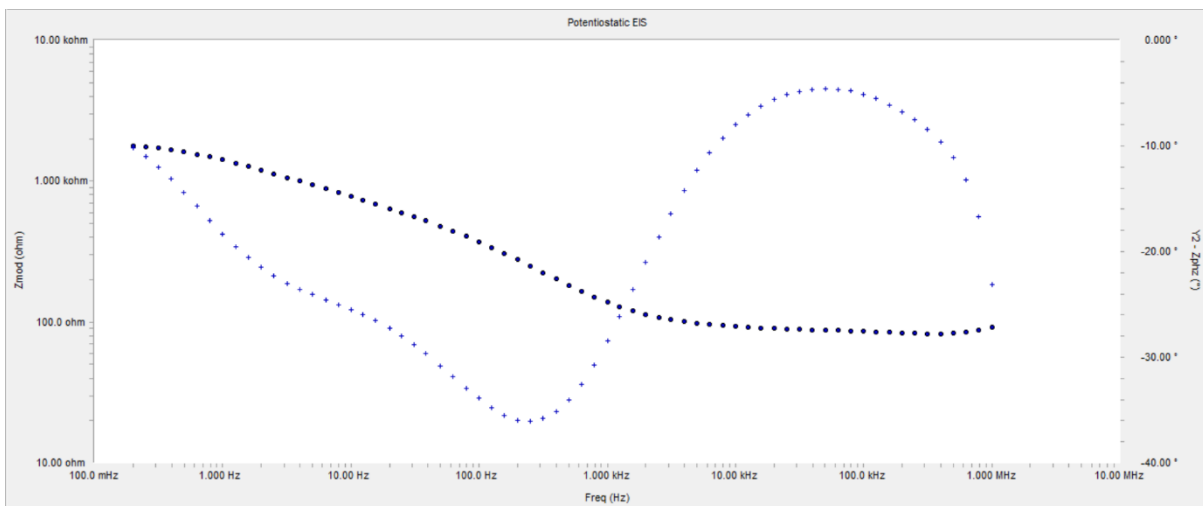

## NSOPU-1

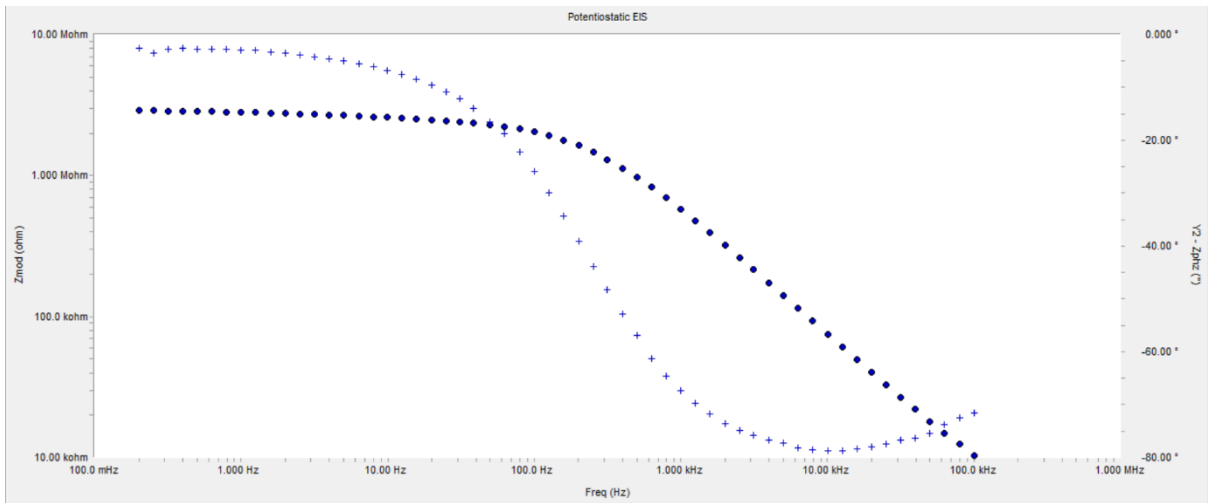

## NSOPU-3

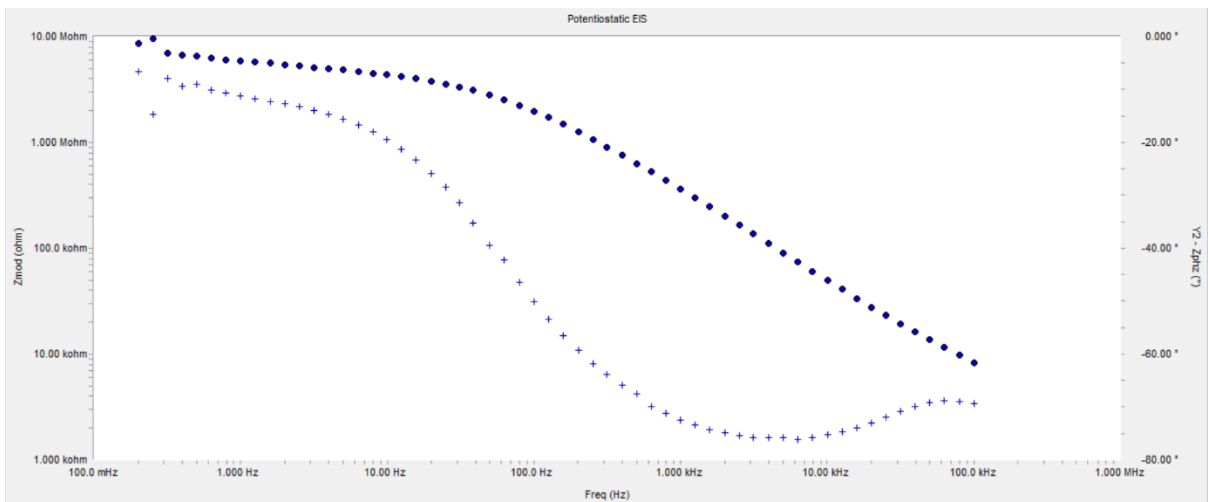

## NSOPU-5

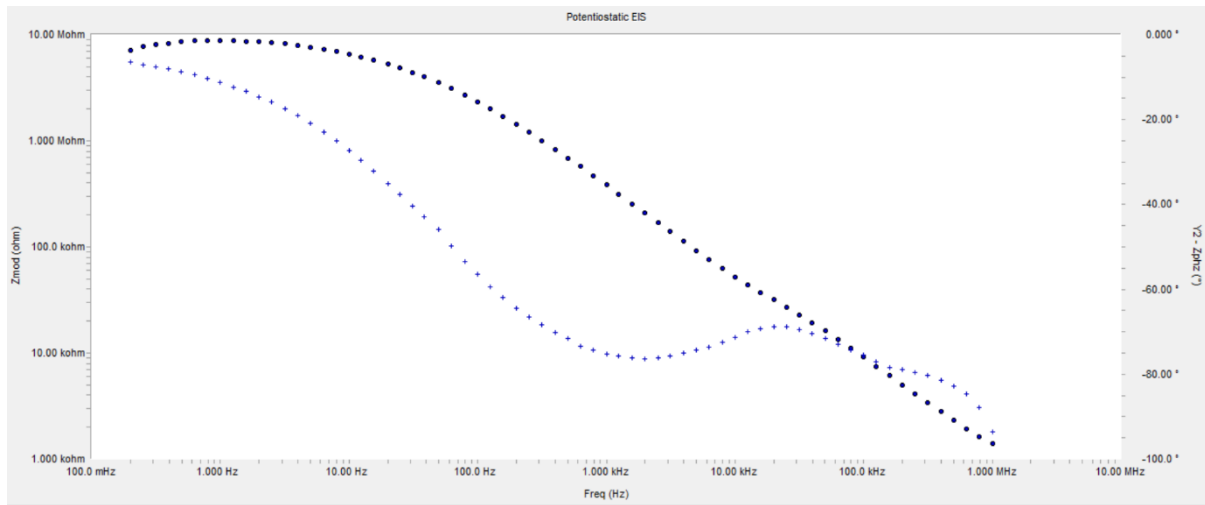

II) Fig. S2 Nyquist plots of PU nanocomposite coatings

### Bare Metal

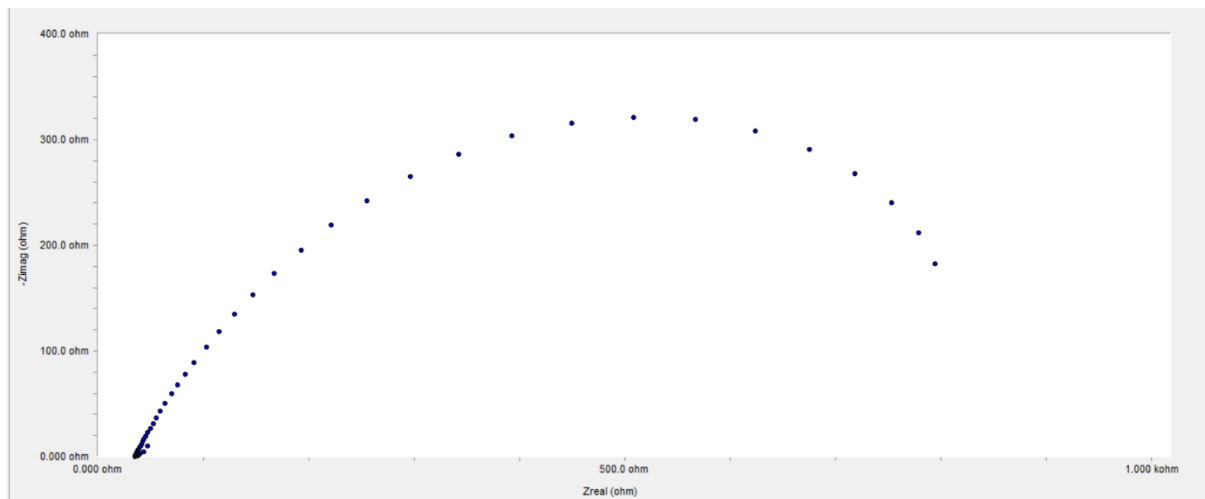

## NSOPU-0

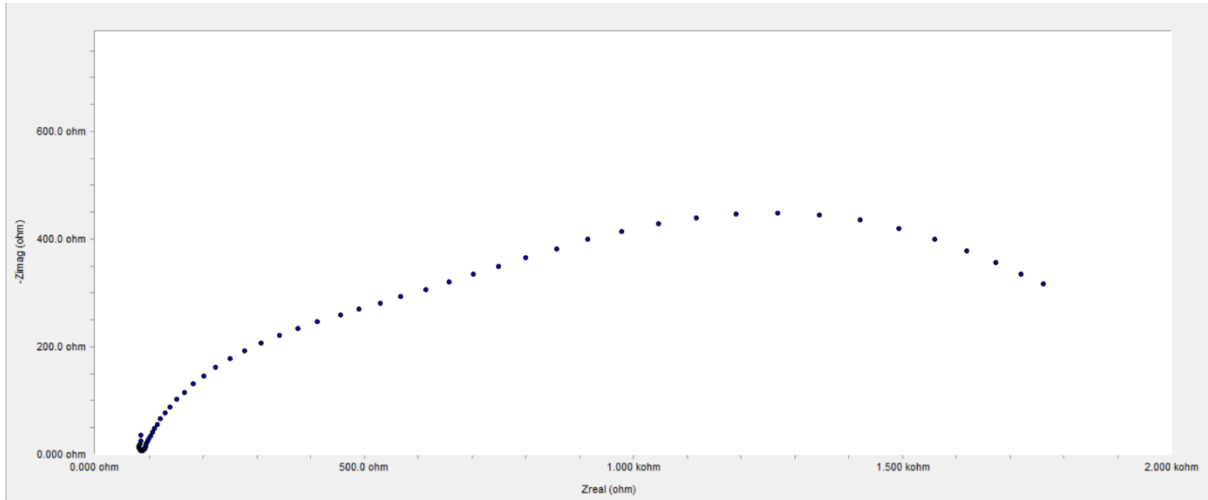

## NSOPU-1

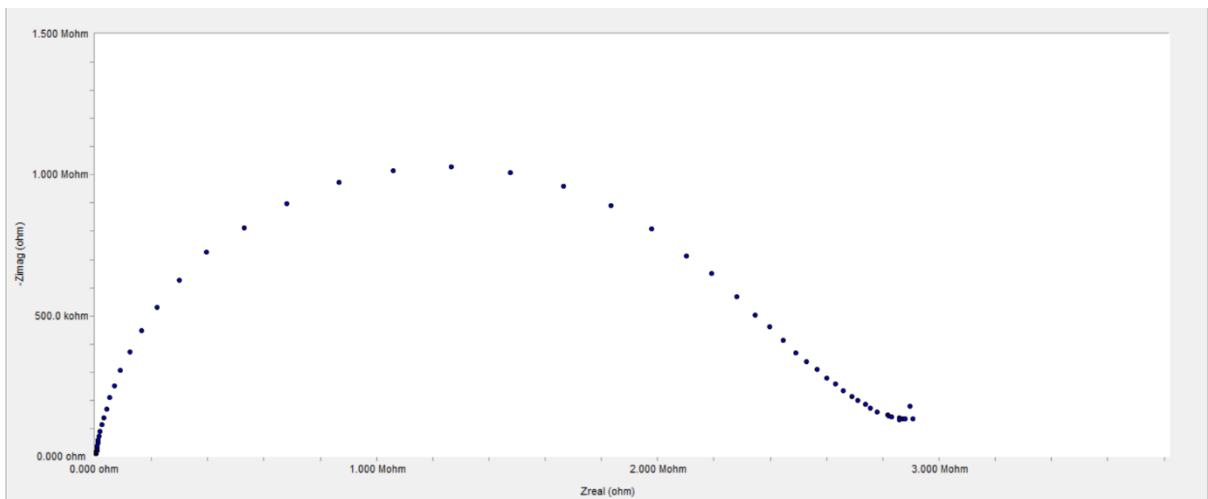

### NSOPU-3

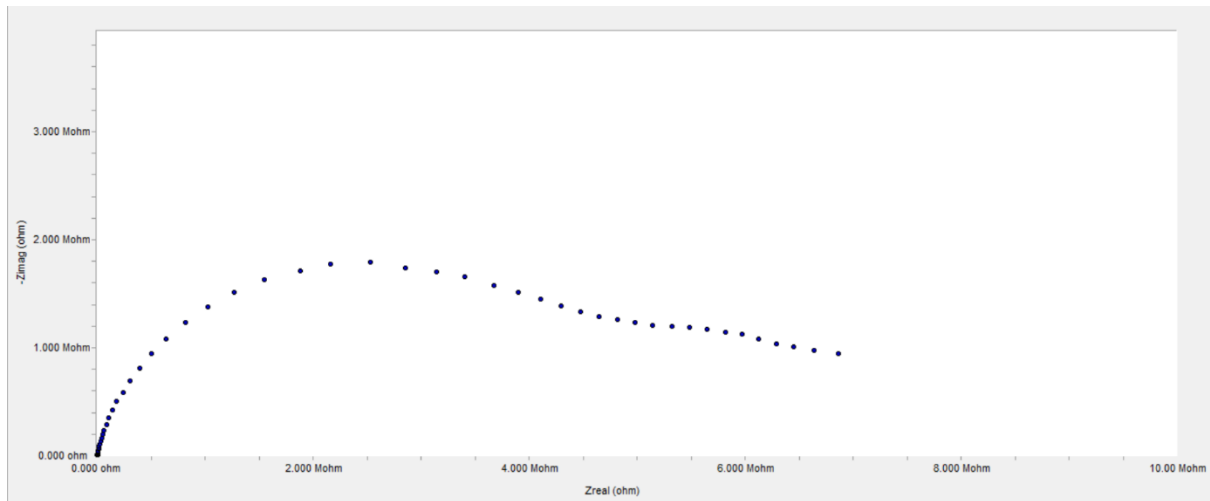

### NSOPU-5

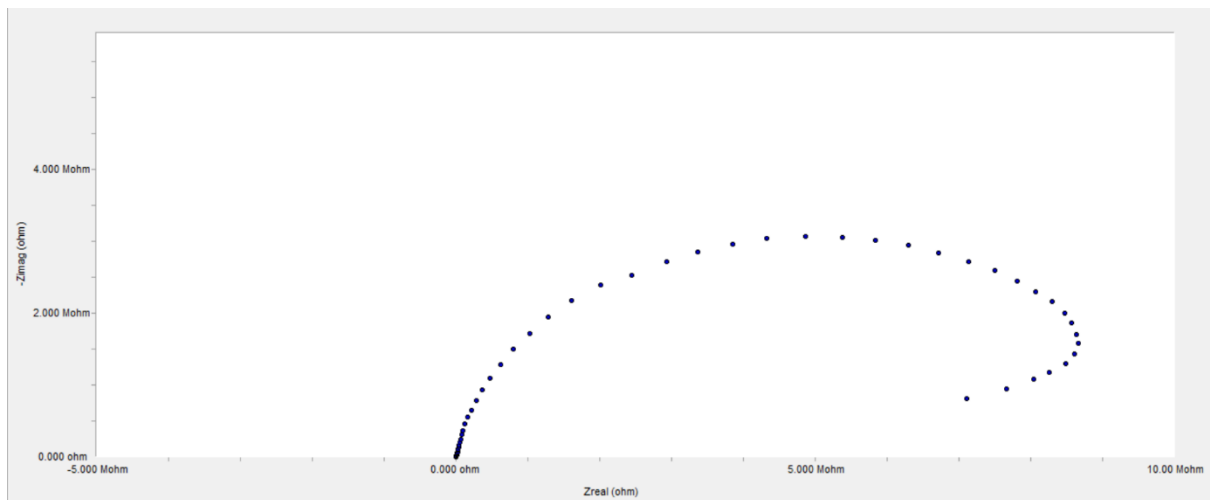

Supplement: Supplementary file 1 [file c012747d2002b677bf1357a7.pdf]
